# Supplementary material
Source: PubMed Central journal article supplement (PMC6535553)
Supplement: AAC.02331-18-s0001.pdf [file AAC.02331-18-s0001.pdf]

**[Online Data Supplement]**

**Species Distribution and Macrolide Susceptibility  
of *Mycobacterium fortuitum* Complex Clinical Isolates**

Su-Young Kim, Seong Mi Moon, Byung Woo Jhun, O Jung Kwon, Hee Jae Huh, Nam Yong

Lee, Seung Heon Lee, Sung Jae Shin, Shannon Kasperbauer, Gwen A. Huitt, Charles L.

Daley, Won-Jung Koh

## Species designations

*M. fortuitum*. Isolates designated as *M. fortuitum* had *rpoB* sequences with 99.0% identity to those of the *M. fortuitum* type strain ATCC 6841 (GenBank accession no. CP014258) and strain CT6 (CP011269); the *hsp65* and 16S rRNA gene sequences of the isolates were 100% identical to those of *M. fortuitum* strain CT6 (CP011269); and the ITS sequences of the isolates showed 99.4% identity with that of *M. fortuitum* strain CT6 (CP011269).

*M. peregrinum*. Isolates designated as *M. peregrinum* had *rpoB* and 16S rRNA gene sequences that were 100% identical to those of the *M. peregrinum* type strain CIP 105382 (AY147166 and NR042915, respectively).

*M. porcinum*. Isolates designated as *M. porcinum* had *rpoB* and 16S rRNA gene sequences with 100% identity to those of the *M. porcinum* type strain CIP 105392 (AY262737 and NR114657, respectively), and the ITS sequences of the isolates showed 100% and 99.0% identity with those of *M. porcinum* strain WH500 (KR995212) and the type strain CIP 105392 (AJ291598), respectively.

*M. septicum*. Isolates designated as *M. septicum* had *rpoB* sequences with 100%, 99.9%, and 98.7% identity with those of *M. septicum* strain 43MF (KY400689), strain D13 (AY772165), and the *M. septicum* type strain ATCC 700731 (AT147167); the 16S rRNA gene sequences of the isolates were 100% identical to that of the type strain ATCC 700731 (NR042916); and the ITS sequences of isolates showed 97.5% identity with that of the type strain ATCC 700731 (AM421289).

*M. conceptionense*. Isolates designated as *M. conceptionense* had 16S rRNA gene sequences with 100% identity to those of the *M. conceptionense* type strain CIP 108544 (NR043239), the *M. senegalense* type strain ATCC 35796 (NR114660), and the *M. farcinogenes* strain ATCC 35753 (NR114440); and the *rpoB* and ITS sequences of isolates were 100% identical to those of *M. conceptionense* strain M137 (HM536982 and HM536981, respectively).

**FIGURE S1.** Alignment of the nucleotide sequences of *erm(39)* (A) and the peptide sequences of Erm(39) (B) from 44 *M. fortuitum* clinical isolates investigated in this study. Clarithromycin-susceptible (S) or -resistant (R) isolates are indicated by the “-S” or “-R”, respectively, after the isolate number. Sequences of *M. fortuitum* DSM46621 (=ATCC 6841) were used as the reference, and dots represent identical nucleotides or amino acids. CT6, *M. fortuitum* strain CT6 (GenBank accession no. CP011269).



35 ..... A .....  
 36 ..... A .....  
 37 ..... A .....  
 38 ..... A .....  
 41 ..... A .....  
 42 ..... A .....  
 44 ..... A .....  
 40 ..... A .....  
 43 ..... A .....  
 12 ..... A .....  
 15 ..... A .....  
 19 ..... A .....  
 30 ..... A .....  
 27 ..... A .....  
 18-S ..... A .....  
 32-S ..... A . C .....  
 2-R ..... A .....  
 21-R ..... A .....  
 22-R ..... A .....  
 25-R ..... A .....  
 28-R ..... A .....  
 39 ..... A ..... C .....

..... 170 ..... 180 ..... 190 ..... 200 ..... 210 ..... 220 ..... 230 ..... 240  
 fortuitum\_DSM46621 GCCGACCGTTGACCGCCATCGAGATCGACCTCCACCGTGCCCGACGGCTCGCCGACCGAACCCTGCCGAGGTGATCGCA  
 33 .....  
 CT6 ..... C ..... G .....  
 1 ..... A ..... C ..... G .....  
 3 ..... C ..... G .....  
 4 ..... C ..... G .....  
 6 ..... C ..... G .....  
 5 ..... C ..... G .....  
 7 ..... C ..... G .....  
 8 ..... C ..... G .....  
 9 ..... C ..... G .....  
 10 ..... C ..... G .....  
 11 ..... C ..... G .....  
 13 ..... C ..... G .....  
 14 ..... C ..... G .....  
 16 ..... C ..... G .....  
 17 ..... C ..... G .....  
 20 ..... C ..... G .....  
 23 ..... A ..... C ..... G .....  
 24 ..... C ..... G .....  
 26 ..... C ..... G .....  
 29 ..... C ..... G .....  
 31 ..... A ..... C ..... G .....  
 34 ..... C ..... G .....  
 35 ..... C ..... G .....  
 36 ..... C ..... G .....  
 37 ..... C ..... G .....  
 38 ..... C ..... G .....  
 41 ..... C ..... G .....  
 42 ..... A ..... C ..... G .....  
 44 ..... C ..... G .....  
 40 ..... C ..... G .....  
 43 ..... C ..... G .....  
 12 ..... G ..... C ..... G .....  
 15 ..... G ..... C ..... G .....  
 19 ..... G ..... C ..... G .....  
 30 ..... G ..... C ..... G .....  
 27 ..... G ..... C ..... G .....  
 18-S ..... G .....  
 32-S ..... C ..... G .....  
 2-R ..... C ..... G .....  
 21-R ..... C ..... G .....  
 22-R ..... C ..... G .....  
 25-R ..... C ..... G .....  
 28-R ..... C ..... G .....  
 39 ..... C ..... G .....

..... 250 ..... 260 ..... 270 ..... 280 ..... 290 ..... 300 ..... 310 ..... 320  
 fortuitum\_DSM46621 ACCGACTTCCTGCGGTACCGGCTGCCGCGCACGCCGACGTGGTGGTGGGCAACCTGCCGTTCCATCTGACCACCGCCAT



38 .....  
 41 .....  
 42 .....  
 44 .....  
 40 .....  
 43 .....  
 12 .....  
 15 .....  
 19 .....  
 30 .....  
 27 .....  
 18-S .....  
 32-S .....  
 2-R .....T.....  
 21-R .....T.....  
 22-R .....T.....  
 25-R .....C.T.....  
 28-R .....T.....  
 39 .....T.....G.....

.....410.....420.....430.....440.....450.....460.....470.....480.....  
 fortuitum\_DSM46621 GTGTCGGCGGGCCACCATGATGACCGCCAGTGGTGGCCGTGGTTCGAATTCGGCCTGGCGCGAAAGGTTTCGGCCGAC

33 .....  
 CT6 .....  
 1 .....  
 3 .....  
 4 .....  
 6 .....  
 5 .....  
 7 .....  
 8 .....  
 9 .....  
 10 .....  
 11 .....  
 13 .....  
 14 .....  
 16 .....  
 17 .....  
 20 .....  
 23 .....  
 24 .....  
 26 .....  
 29 .....  
 31 .....  
 34 .....  
 35 .....  
 36 .....  
 37 .....  
 38 .....  
 41 .....  
 42 .....  
 44 .....  
 40 .....  
 43 .....  
 12 .....  
 15 .....  
 19 .....  
 30 .....  
 27 .....  
 18-S .....  
 32-S .....  
 2-R .....G.....  
 21-R .....G.....  
 22-R .....G.....  
 25-R .....  
 28-R .....  
 39 .....A.....G.....C.....

.....490.....500.....510.....520.....530.....540.....550.....560.....  
 fortuitum\_DSM46621 GCGTTCCGGCCGCGCCGAGTGTGGATGCCGGGCTGCTGACCATTCAGCGCCGAGCTGAGCCGCTACTCCCGTGGGCCGA

33 .....A.....  
 CT6 .....  
 1 .....

3 .....  
4 .....  
6 .....  
5 .....  
7 .....  
8 .....  
9 .....  
10 .....  
11 .....  
13 .....  
14 .....  
16 .....  
17 .....  
20 .....  
23 .....  
24 .....  
26 .....  
29 .....  
31 .....  
34 .....  
35 .....  
36 .....  
37 .....  
38 .....  
41 .....  
42 .....  
44 .....  
40 .....  
43 .....  
12 .....A.....AT.....  
15 .....A.....AT.....  
19 .....A.....AT.....  
30 .....A.....AT.....  
27 .....A.....AT.....  
18-S .....A.....  
32-S .....A.....  
2-R .....G.....  
21-R .....G.....  
22-R .....G.....  
25-R .....G.....  
28-R .....A.....G.....  
39 .....A.....T.....A.....

570 580 590 600 610 620 630 640  
fortuitum\_DSM46621 CCGTTCGTGCGTATCAGGCGCTGGTCCACAGGGTTTTCACCGGGCGCGGCGTGGTCTGGCCCAGATTCTGCGGCCCCACG  
33 .....A.....C.....  
CT6 .....A.....T.....T.....  
1 .....A.....T.....T.....  
3 .....A.....T.....T.....  
4 .....A.....T.....T.....  
6 .....A.....T.....T.....  
5 .....A.....T.....T.....  
7 .....A.....T.....T.....  
8 .....A.....T.....T.....  
9 .....A.....T.....T.....  
10 .....A.....T.....T.....  
11 .....A.....T.....T.....  
13 .....A.....T.....T.....  
14 .....A.....T.....T.....  
16 .....A.....T.....T.....  
17 .....A.....T.....T.....  
20 .....A.....T.....T.....  
23 .....A.....T.....T.....  
24 .....A.....T.....T.....  
26 .....A.....T.....T.....  
29 .....A.....T.....T.....  
31 .....A.....T.....T.....  
34 .....A.....T.....T.....  
35 .....A.....T.....T.....  
36 .....A.....T.....T.....  
37 .....A.....T.....T.....  
38 .....A.....T.....T.....  
41 .....A.....T.....T.....  
42 .....A.....T.....T.....



```

44      . . . . . A . . . T . . . . . T . . . . .
40      . . . . . A . . . . .
43      . . . . . A . . . . .
12      . . . . . C . . . . .
15      . . . . . C . . . . .
19      . . . . . C . . . . .
30      . . . . . C . . . . .
27      . . . . . C . . . . .
18-S    . . . . . C . . . . . T . . . . .
32-S    . . . . . C . . . . . T . . . . .
2-R     . . . . . A . . . . . A . . . . .
21-R    . . . . . A . . . . . A . . . . .
22-R    . . . . . A . . . . . A . . . . .
25-R    . A . . . . . A . . . . .
28-R    . C . . . A . . . A . . . . . A . . . . .
39      . . . . . A . . . . . T . . . . .

```

```

          650      660      670      680      690      700      710      720
fortuitum_DSM46621 . . . . | . . . . | . . . . | . . . . | . . . . | . . . . | . . . . | . . . . |
33      TGCACCCACGGTGGCTGTCTGCCAACGGAATTCACCCGTCGGCTCTGCCAGAGCGCTGACGGCTCGACAGTGGGTGGCG
CT6
1
3
4
6
5
7
8
9
10
11
13
14
16
17
20
23
24
26
29
31
34
35
36
37
38
41
42
44
40
43
12
15
19
30
27      . . . . . A . . . . .
18-S
32-S
2-R     . . . . . A . . . . . A . . . A . . . . .
21-R    . . . . . A . . . . . A . . . A . . . . .
22-R    . . . . . A . . . . . A . . . A . . . . .
25-R    . C . . . A . . . A . . . . . C . C . . A . . . . .
28-R    . . . . . A . . . . . C . C . . A . . . . .
39      . . . . . A . . . . .

```

```

          730      740
fortuitum_DSM46621 . . . . | . . . . | . . . . | . . . . |
33      TTGTTTCGATGCCCGGCTAG
CT6
1
3
4
6

```

|      |             |
|------|-------------|
| 5    | .....       |
| 7    | .....       |
| 8    | .....       |
| 9    | .....       |
| 10   | .....       |
| 11   | .....       |
| 13   | .....       |
| 14   | .....       |
| 16   | .....       |
| 17   | .....       |
| 20   | .....       |
| 23   | .....       |
| 24   | .....       |
| 26   | .....       |
| 29   | .....       |
| 31   | .....       |
| 34   | .....       |
| 35   | .....       |
| 36   | .....       |
| 37   | .....       |
| 38   | .....       |
| 41   | .....       |
| 42   | .....       |
| 44   | .....       |
| 40   | .....       |
| 43   | .....       |
| 12   | .....       |
| 15   | .....       |
| 19   | .....       |
| 30   | .....       |
| 27   | .....       |
| 18-S | .....       |
| 32-S | .....       |
| 2-R  | .....A..... |
| 21-R | .....A..... |
| 22-R | .....A..... |
| 25-R | .....A..... |
| 28-R | .....A..... |
| 39   | .....       |



35 .....  
 36 .....  
 37 .....  
 38 .....  
 41 .....  
 42 .....  
 44 .....  
 40 .....  
 43 .....  
 12 .....  
 15 .....  
 19 .....  
 30 .....  
 27 .....  
 18-S .....  
 32-S .....  
 2-R .....  
 21-R .....  
 22-R .....  
 25-R ..... T .....  
 28-R .....  
 39 ..... V ..... R. P.

|                    | 170                                   | 180           | 190             | 200               | 210              | 220              | 230 | 240 |
|--------------------|---------------------------------------|---------------|-----------------|-------------------|------------------|------------------|-----|-----|
| fortuitum_DSM46621 | AFR                                   | PRPSVDAGLLTIQ | RRAEPLLPWADRRAY | QALVHRVFTGRGRGLAQ | ILRPHVHPRWLSANGI | HPSALPRALTARQWVA |     |     |
| 33                 | .....                                 |               |                 |                   |                  |                  |     |     |
| CT6                | .....                                 |               |                 |                   |                  |                  |     |     |
| 1                  | .....                                 |               |                 |                   |                  |                  |     |     |
| 3                  | .....                                 |               |                 |                   |                  |                  |     |     |
| 4                  | .....                                 |               |                 |                   |                  |                  |     |     |
| 6                  | .....                                 |               |                 |                   |                  |                  |     |     |
| 5                  | .....                                 |               |                 |                   |                  |                  |     |     |
| 7                  | .....                                 |               |                 |                   |                  |                  |     |     |
| 8                  | .....                                 |               |                 |                   |                  |                  |     |     |
| 9                  | .....                                 |               |                 |                   |                  |                  |     |     |
| 10                 | .....                                 |               |                 |                   |                  |                  |     |     |
| 11                 | .....                                 |               |                 |                   |                  |                  |     |     |
| 13                 | .....                                 |               |                 |                   |                  |                  |     |     |
| 14                 | .....                                 |               |                 |                   |                  |                  |     |     |
| 16                 | .....                                 |               |                 |                   |                  |                  |     |     |
| 17                 | .....                                 |               |                 |                   |                  |                  |     |     |
| 20                 | .....                                 |               |                 |                   |                  |                  |     |     |
| 23                 | .....                                 |               |                 |                   |                  |                  |     |     |
| 24                 | .....                                 |               |                 |                   |                  |                  |     |     |
| 26                 | .....                                 |               |                 |                   |                  |                  |     |     |
| 29                 | .....                                 |               |                 |                   |                  |                  |     |     |
| 31                 | .....                                 |               |                 |                   |                  |                  |     |     |
| 34                 | .....                                 |               |                 |                   |                  |                  |     |     |
| 35                 | .....                                 |               |                 |                   |                  |                  |     |     |
| 36                 | .....                                 |               |                 |                   |                  |                  |     |     |
| 37                 | .....                                 |               |                 |                   |                  |                  |     |     |
| 38                 | .....                                 |               |                 |                   |                  |                  |     |     |
| 41                 | .....                                 |               |                 |                   |                  |                  |     |     |
| 42                 | .....                                 |               |                 |                   |                  |                  |     |     |
| 44                 | .....                                 |               |                 |                   |                  |                  |     |     |
| 40                 | .....                                 |               |                 |                   |                  |                  |     |     |
| 43                 | .....                                 |               |                 |                   |                  |                  |     |     |
| 12                 | .....                                 |               |                 |                   |                  |                  |     |     |
| 15                 | .....                                 |               |                 |                   |                  |                  |     |     |
| 19                 | .....                                 |               |                 |                   |                  |                  |     |     |
| 30                 | .....                                 |               |                 |                   |                  |                  |     |     |
| 27                 | ..... T .....                         |               |                 |                   |                  |                  |     |     |
| 18-S               | .....                                 |               |                 |                   |                  |                  |     |     |
| 32-S               | .....                                 |               |                 |                   |                  |                  |     |     |
| 2-R                | ..... T ..... Q .....                 |               |                 |                   |                  |                  |     |     |
| 21-R               | ..... T ..... Q .....                 |               |                 |                   |                  |                  |     |     |
| 22-R               | ..... T ..... Q .....                 |               |                 |                   |                  |                  |     |     |
| 25-R               | ..... H ..... T ..... Q .....         |               |                 |                   |                  |                  |     |     |
| 28-R               | ..... D ..... T ..... T ..... Q ..... |               |                 |                   |                  |                  |     |     |
| 39                 | ..... I ..... S .....                 |               |                 |                   |                  |                  |     |     |

fortuitum\_DSM46621 .....  
 LFDAAAG\*

|      |         |
|------|---------|
| 33   | .....*  |
| CT6  | .....*  |
| 1    | .....*  |
| 3    | .....*  |
| 4    | .....*  |
| 6    | .....*  |
| 5    | .....*  |
| 7    | .....*  |
| 8    | .....*  |
| 9    | .....*  |
| 10   | .....*  |
| 11   | .....*  |
| 13   | .....*  |
| 14   | .....*  |
| 16   | .....*  |
| 17   | .....*  |
| 20   | .....*  |
| 23   | .....*  |
| 24   | .....*  |
| 26   | .....*  |
| 29   | .....*  |
| 31   | .....*  |
| 34   | .....*  |
| 35   | .....*  |
| 36   | .....*  |
| 37   | .....*  |
| 38   | .....*  |
| 41   | .....*  |
| 42   | .....*  |
| 44   | .....*  |
| 40   | .....*  |
| 43   | .....*  |
| 12   | .....*  |
| 15   | .....*  |
| 19   | .....*  |
| 30   | .....*  |
| 27   | .....*  |
| 18-S | .....*  |
| 32-S | .....*  |
| 2-R  | ..E...* |
| 21-R | ..E...* |
| 22-R | ..E...* |
| 25-R | ..E...* |
| 28-R | ..E...* |
| 39   | .....*  |

**FIGURE S2.** Alignment of the nucleotide sequences of *erm*(39) (A) and the peptide sequences of Erm(39) (B) from 10 *M. porcinum* clinical isolates investigated in this study. The clarithromycin-resistant (R) isolate is indicated by the “-R” after the isolate number. Sequences of the *M. porcinum* type strain ATCC 33776 (GenBank accession no. DQ447745) were used as the reference, and dots represent identical nucleotides or amino acids.

A

```
          10      20      30      40      50      60      70      80
porcinum_DQ447745  GTGCCTTCAACTCATCACGGCCGTCACGAGTACGGCCAGAACTTCCTGTGCGACCGACGAGTGATCGCCGACATCGTCCAC
51      .....T.....
54      .....T.....
50-R      .....T.....
46      .....T.....
45      .....T.....
49      .....T.....
53      .....T.....
47      .....T.....
48      .....T.....
52      .....T.....
```

```
          90      100     110     120     130     140     150     160
porcinum_DQ447745  AATCGTTTCGCGCACAAACAGGTCCCATCATCGAAATCGGGCGCGGGCGACGGTGGCTCACCTGCCACTGCAACGGTTGA
51      .....
54      .....
50-R      .....
46      .....
45      .....
49      .....
53      .....
47      .....
48      .....
52      .....

```

```
          170     180     190     200     210     220     230     240
porcinum_DQ447745  ACCGGCAGCTGACCGCCATCGAGATCGACCGGGCGCGGGCGGACGATTGGCGGACCGAACTTCAGCCGAAGTGGTCAGT
51      .....C.....
54      .....C.....
50-R      .....C.....
46      .....C.....
45      .....C.....
49      .....C.....
53      .....C.....
47      .....C.....
48      .....C.....
52      .....C.....

```

```
          250     260     270     280     290     300     310     320
porcinum_DQ447745  GCGGATTTTCTGAAGTACCGCCTCCCACTGCGCCGCATGTGGTGGTGGGCAATCTGCCCTTTCACCTGACCACCGCGAT
51      .....CG.....T.....
54      .....CG.....T.....
50-R      .....CG.....T.....
46      .....CG.....T.....
45      .....CG.....T.....
49      .....A.....
53      .....A.....
47      .....
48      .....
52      .....

```

```
          330     340     350     360     370     380     390     400
porcinum_DQ447745  GCTGCGGCGACTGCTACACGGCCCGGGGTGGACCGACGCCGTCCTGCTGATGCAATGGGAGGTGGCCCGCCGACGAGCCG
51      C.....
54      C.....
50-R      C.....
46      C.....
45      C.....
49      C.....
53      C.....
47      C.....
48      C.....
52      C.....

```

410 420 430 440 450 460 470 480  
porcinum\_DQ447745 ..G.....  
51 ..G.....  
54 ..G.....  
50-R ..G.....  
46 ..G.....  
45 ..G.....  
49 .....  
53 .....  
47 .....  
48 .....  
52 ..G.....

490 500 510 520 530 540 550 560  
porcinum\_DQ447745 GCCTTCGGCCAGACCCGGTGTGGACGCCGGGCTGTTGACCATCACACGCCGTGGTGAACCCCTGGTCCCCACGGCCGA  
51 .....G.....  
54 .....G.....  
50-R .....G.....  
46 .....G.....  
45 .....G.....  
49 .....A.....  
53 .....A.....  
47 .....A.....  
48 .....A.....  
52 .....A.....

570 580 590 600 610 620 630 640  
porcinum\_DQ447745 CCGACGCAGGTATCAGGCCCTCGCACACGAGGTTCACCGGGCGGGCCACGGCATGGCGCAGATCCTGCGCCATCACG  
51 ..G...C.....G.....  
54 ..G...C.....  
50-R ..G...C.....  
46 ..G...C.....  
45 ..G...C.....  
49 .....  
53 .....  
47 .....  
48 .....  
52 ..G...C.....

650 660 670 680 690 700 710 720  
porcinum\_DQ447745 TGGATCGTCGGTGGTTGCAGGCCAACGGAATTCATCCCTCGGCGCTGCCGCGTACCTGTCCGCACAACAGTGGGCCGCC  
51 ..G.....  
54 .....  
50-R .....  
46 .....  
45 .....  
49 .....  
53 .....  
47 .....  
48 .....  
52 ..G.....

730 740  
porcinum\_DQ447745 CTGTTCGATGCGGTCCGCTAA  
51 .....  
54 .....  
50-R .....  
46 .....  
45 .....  
49 .....  
53 .....  
47 .....  
48 .....  
52 ..G.....



# B

```
          10      20      30      40      50      60      70      80
porcinum_DQ447745  VPSTHHGRHEYGNFLCDRRVIADIVTIVSRRTTGPPIIEIGAGDGALTLPLQRLNRQLTAIEIDRRRARRLADRTSAEVS
51  .....
54  .....
50-R .....
46  .....
45  .....
49  .....
53  .....
47  .....
48  .....
52  .....
```

```
          90      100     110     120     130     140     150     160
porcinum_DQ447745  ADFLKYLPTAPHVVGNLPPHLLTAMLRLRHGPGWTDVLLMQWEVARRRAAIGGATMMTAQWWPWFEEFGLARKVSAD
51  ....RX.....I.....V.....
54  ....R.....I.....V.....
50-R .....R.....I.....V.....
46  ....R.....I.....V.....
45  ....R.....I.....V.....
49  .....I.....
53  .....I.....
47  .....I.....
48  .....I.....
52  .....I.....
```

```
          170     180     190     200     210     220     230     240
porcinum_DQ447745  AFRPRPGVDAGLLTITRRGEPLVPTADRRRYQALAEVFTGRGHGMAQILRHHVDRRWLQANGIHPSALPRDLQAQQWAA
51  .....R..G.....
54  .....
50-R .....
46  .....
45  .....
49  .....
53  .....
47  .....
48  .....
52  .....
```

```
porcinum_DQ447745  ....|..
51  LFD AVR*
54  .....*
50-R .....*
46  .....*
45  .....*
49  .....*
53  .....*
47  .....*
48  .....*
52  .....*
```
